# Supplementary material for: Comparison of Indexes to Measure Comorbidity Burden and Predict All-Cause Mortality in Rheumatoid Arthritis
Source: Preprints.org preprint supplement (doi:10.20944/preprints202106.0403.v1), 2021-06-15
Supplement: Supplementary file 1 [file supplementary]

**Supplementary Table 1. The formula of four comorbidity indexes**

| **Index** | **Number of conditions** | **Formula** |
| --- | --- | --- |
| **Dartmouth-Manitoba's CCI (range 0–33)** | **17** | **6 × (metastatic solid tumor + acquired immune deficiency syndrome)**  **+3 × (severe or moderate liver disease)**  **+2 × (hemiplegia + renal disease + diabetes with chronic complications + any malignancy, including leukemia and lymphoma)**  **+1 × (myocardial infarction + congestive heart failure + peripheral vascular disease + cerebrovascular disease + dementia + chronic obstructive pulmonary disease + connective tissue disease + ulcer + mild liver disease + diabetes, mild to moderate)** |
| **Elixhauser point system**  **(range -19 to 89)** | **30** | **12 × metastatic cancer**  **+11 × liver disease**  **+9 × lymphoma**  **+7 × (congestive heart failure + paralysis)**  **+6 × (weight loss + other neurological disorder)**  **+5 × (cardiac arrhythmias + renal failure + fluid or electrolyte disorder)**  **+4 × (pulmonary circulation disorder + solid tumor without metastasis)**  **+3 × (chronic pulmonary disease + coagulopathy)**  **+2 × peripheral vascular disease**  **+0 × (acquired immune deficiency syndrome + alcohol abuse + diabetes, complicated + diabetes, uncomplicated + hypertension + hypothyroidism + peptic ulcer disease + psychoses + RA/collagen vascular disease)**  **- 1 × valvular disease**  **- 2 × (blood loss anemia + deficiency anemia)**  **- 3 × depression**  **- 4 × obesity**  **- 7 × drug abuse** |
| **Counted MMI**  **(range 1–12)** | **12** | **1 × (hypertension + obesity + depression + cancer + diabetes mellitus + asthma + coronary heart disease + viral hepatitis + chronic obstructive pulmonary disease + chronic kidney disease + diverticulitis + stroke)** |
| **RDCI (range 0–9)** | **11** | **2 × lung disease + [2 × (heart attack, other cardiovascular disease, or stroke) or 1 × hypertension] + fracture + depression + diabetes + cancer + (ulcer or stomach problem)** |

**Supplementary Table 2. Comparison of the different comorbidity indexes**

|  | **CDI** | **ECI** | **MMI** | **RDCI** |
| --- | --- | --- | --- | --- |
| **Number of diseases** | **19** | **30** | **40** | **11** |
| **Original outcome** | **One-year mortality** | **Hospital stay, cost, and mortality** | **Quality of life** | **Mortality, hospitalization, disability, and costs** |
| **Unique disease** | **Dementia** | **Alcohol related disease, obesity, and thyroid disorders** | **Blindness, dementia, alcohol related disease, obesity, and thyroid disorders** | **Fracture** |
| **Common disease** | **Lung disease, stroke, cancer, heart failure, diabetes, coronary heart disease** | | | |
| **Number of papers about rheumatoid arthritis before 2018** | **Numerous** | **2** | **1** | **2** |
| **Dementia** | **O** | **X** | **O** | **X** |
| **Epilepsy** | **X** | **O** | **O** | **X** |
| **Liver disease** | **O** | **O** | **O** | **X** |
| **Lung disease** | **O** | **O** | **O** | **O** |
| **Blindness** | **X** | **X** | **O** | **X** |
| **Renal disease** | **O** | **O** | **O** | **X** |
| **Substance/alcohol use** | **X** | **O** | **O** | **X** |
| **Depression** | **X** | **O** | **O** | **O** |
| **Heart failure** | **O** | **O** | **O** | **O** |
| **Obesity** | **X** | **O** | **O** | **X** |
| **Thyroid disorder** | **X** | **O** | **O** | **X** |
| **Stroke** | **O** | **O** | **O** | **O** |
| **Cancer** | **O** | **O** | **O** | **O** |
| **Diabetes** | **O** | **O** | **O** | **O** |
| **Connective tissue disease** | **O** | **O** | **X** | **X** |

O Comorbidity which is included in the comorbidity index

X Comorbidity which is not included in the comorbidity index

**Supplementary Table 3. Comparison of comorbidity indexes in patients with rheumatoid arthritis**

| Author, year of publication (Ref) | Country | Study design | No. of RA patients | Comorbidity index | Summary of the study |
| --- | --- | --- | --- | --- | --- |
| England et al., 2015 (20) | US  Veterans Affairs Rheumatoid  Arthritis (VARA) registry and the Rheumatology and  Arthritis Investigator’s Network Database (RAIN-DB) | Cohort | 4765 | RDCI,  CDI, FCI, ETS, EPS, and COUNT | ETS and RDCI best predicted death. The FCI best predicted function |
| Radner et al., 2015 (18) | US  Brigham and Women’s Rheu- matoid Arthritis Sequential Study(BRASS) and COMOrbidities in Rheumatoid Arthritis Study(COMORA) | Cohort | 876 | MMI.count, MMI.weight, MMI.weight using beta-coefficients, CCI, and FCI | MMI based on EQ-5D performed better than CCI. Not much improvement was obtained by weighting. |
| Putrik et al., 2018 (25) | Norway  Norwegian Register-  DMARD study (patients with inflammatory joint diseases treated with DMARDs) | Cohort | 4126 | RDCI, CDI, FCI | Three indexes performed comparably well. CDI performing slightly worse when predicting functioning and health. |
| Nikiphorou et al., 2019 (26) | UK  The Royal College of General Practitioners (RCGP) Research and Surveillance Centre (RSC) database | Cohort | 6591 | CCI, RDCI | In early RA, both the RDCI and CCI were associated with an increased risk of all-cause mortality. RDCI predicts all-cause mortality better than CCI. |
| England et al., 2021(27) | US  Commercial insurance database(MarketScan) | Cohort | 138891 | CCI, RDCI | CCI and RDCI showed a higher burden of multimorbidity in RA. Similar findings were obtained when requiring ≥1 year of follow-up after RA diagnosis. |

Abbreviations: Rheumatic Disease Comorbidity Index (RDCI) with the Charlson-Deyo Index (CDI), functional comorbidity index (FCI), Elixhauser Total Score (ETS), Elixhauser Point System (EPS), simple comorbidity count (COUNT), counted multimorbidity index (MMI.count), weighted multimorbidity index (MMI.weight), MMI.weight using beta-coefficients (weighted multimorbidity index using beta-coefficients), Charlson comorbidity index (CCI)

**Supplementary Figure 1. The impact of comorbidity on disease-specific survival showed in weighted Kaplan-Meire curve. (a) Charlson Comorbidity Index. (b) Elixhauser Comorbidity Index. (c) Multimorbidity Index. (d) Rheumatic Disease Comorbidity Index. (All log-rank test’s p-values <0.001)**

**a**


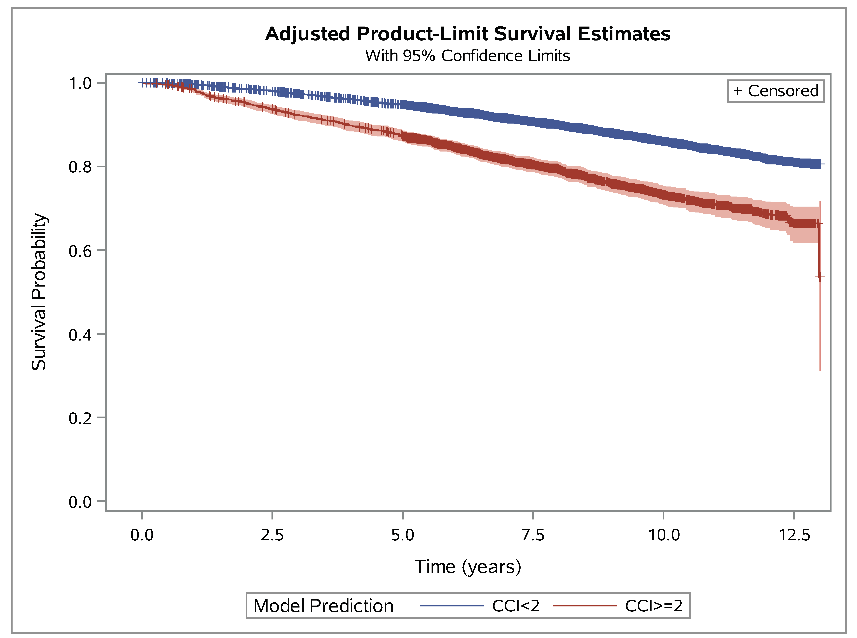


**b**


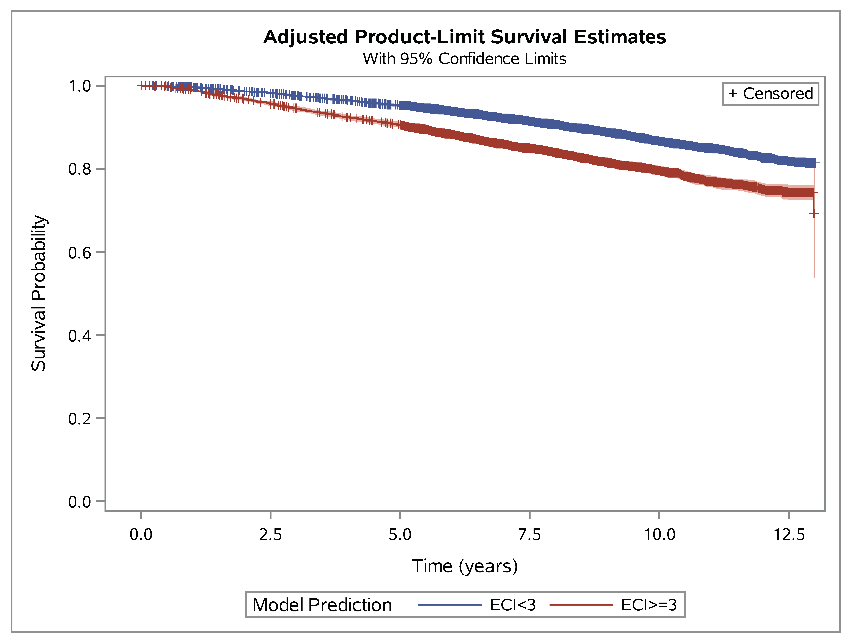


**c**


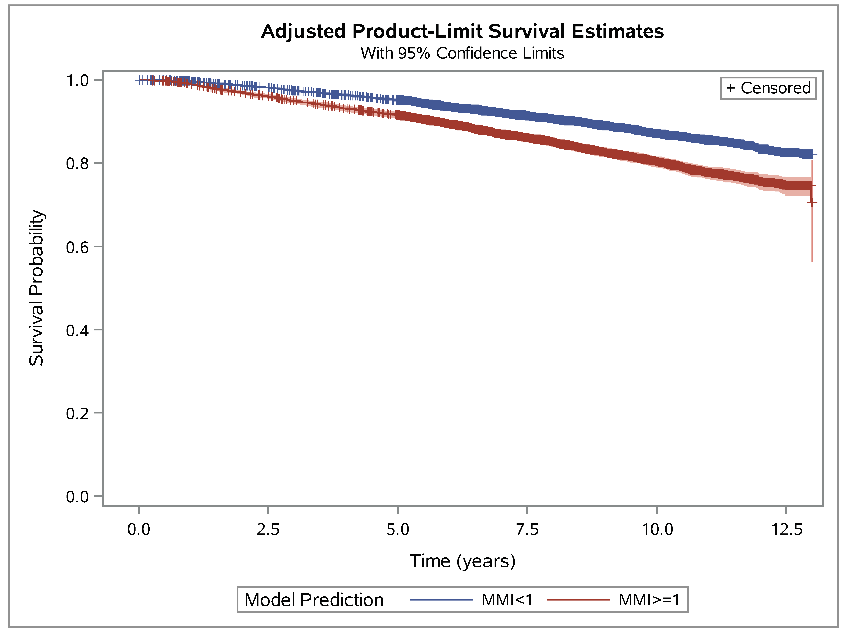


**d**

**
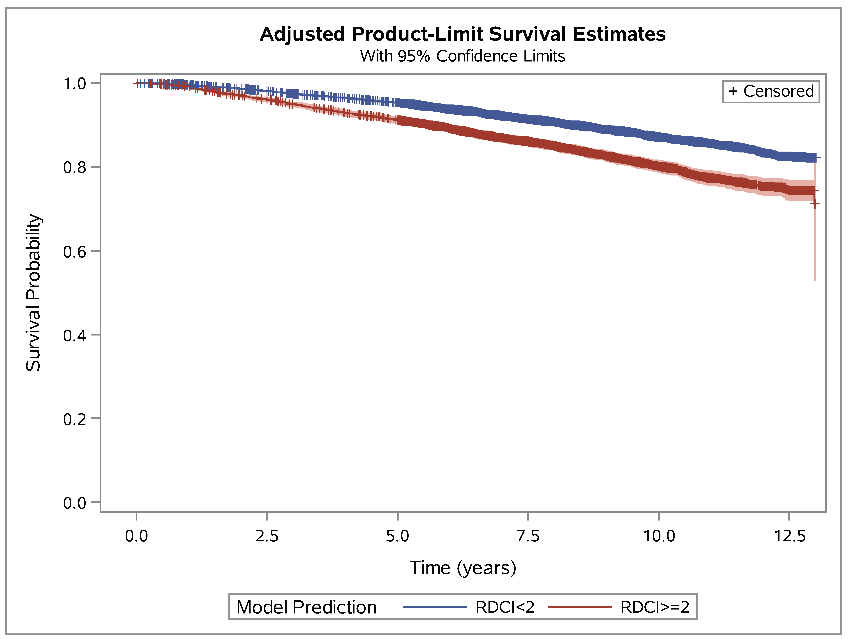
**

*The comorbidity indexes are calculated during the diagnostic period (the period of 4 months before and after the initial diagnosis)

**Supplementary Figure 2. Receiver Operating Characteristic (ROC) Curve for Prediction of (a) 1-year Mortality and (b) 5-year Mortality by Four Comorbidity Indexes.**

**a**

**
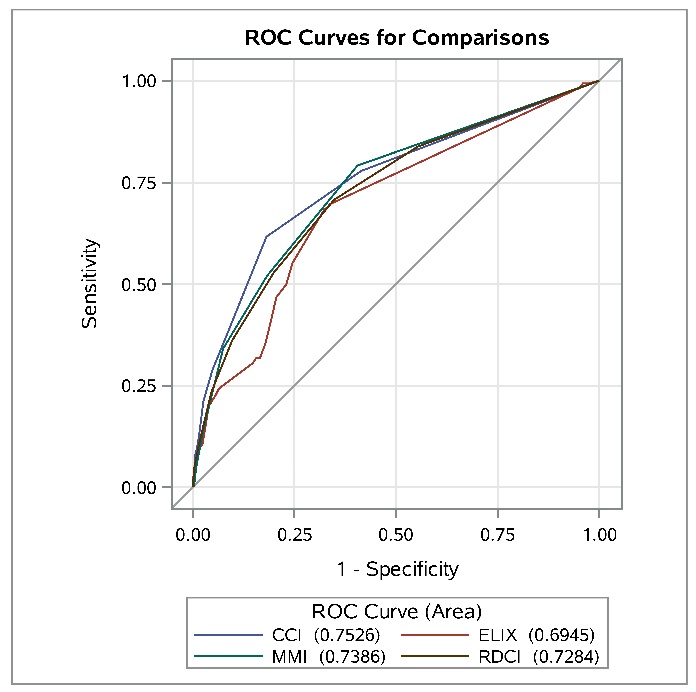
**

**b**

**
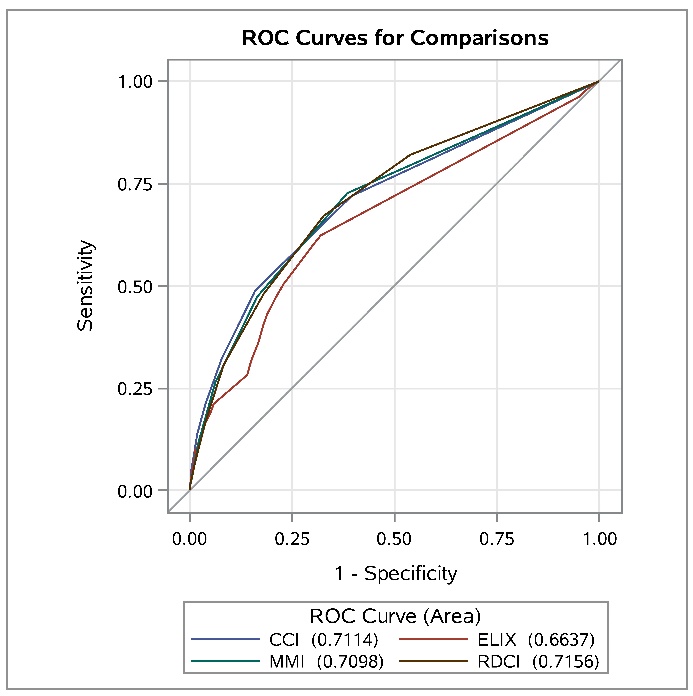
**/
